# Supplementary material for: Characterization of nanoparticles using coupled gel immobilization and label-free optical imaging
Source: Royal Society of Chemistry journal article supplement (doi:10.1039/d1cc05896g), 2021-01-01
Supplement: d1cc05896g6.pdf [file d1cc05896g6.pdf]

1 **Supplementary Information for**

2 **Characterization of Nanoparticles Using Coupled Gel Immobilization**

3 **and Label-free Optical Imaging**

4 *Fengbang Wang,<sup>a</sup> Zihan Chen,<sup>ac</sup> Yuanyuan Wang,<sup>ad</sup> Yongguang Yin,<sup>ab</sup> Chunyan Ma,<sup>a</sup> Maoyong*

5 *Song,<sup>abc\*</sup> Guibin Jiang<sup>b</sup>*

6 <sup>a</sup>Key Laboratory of Environmental Nanotechnology and Health Effects, Research Center for  
7 Eco-Environmental Sciences, Chinese Academy of Sciences, Beijing 100085, China;

8 <sup>b</sup>State Key Laboratory of Environmental Chemistry and Ecotoxicology, Research Center for  
9 Eco-Environmental Sciences, Chinese Academy of Sciences, Beijing 100085, China;

10 <sup>c</sup>University of Chinese Academy of Sciences, Beijing 100049, China

11 <sup>d</sup>China CDC Key Laboratory of Environment and Population Health, National Institute of  
12 Environmental Health, Chinese Center for Diseases Control and Prevention, Beijing, 100050,  
13 China

14 \*Corresponding author: Maoyong Song, Email: [smsong@rcees.ac.cn](mailto:smsong@rcees.ac.cn)

## 15 **Experimental Section**

16 **Materials and reagents.** The different sizes of citrate-stabilized AgNPs (20, 30, 40, 50, 60, 80,  
17 and 100 nm) (1 mg/mL) were purchased from Nanocomposix company (San Diego, USA).  
18 Glycerol Jelly Mounting Medium was obtained from Solarbio Science & Technology Co., Ltd.  
19 (Beijing, China). HCl solution, NaCl and NaOH were purchased from Sigma-Aldrich (Shanghai,  
20 China).

21 **The immobilization of NPs into Gel.** The dispersed AgNPs were immobilized by Glycerol  
22 Jelly Mounting Medium to inhibit their Brownian motion. First, Glycerol Jelly Mounting Medium  
23 (10 g gelatin dissolved into 60 mL water and mixed with 70 mL glycerol) was heated into liquid  
24 gel solution at 45 °C. Then AgNPs dilutions were mixed with Glycerol Jelly Mounting Medium  
25 (1:10 by volume) by vortex (30 s) and sonication (30 s) at 45 °C. The final concentration of AgNPs  
26 in the mixture are ranged from 0 to 10 µg/mL. Lastly, 50 µL gel containing AgNPs were transferred  
27 onto a culture dish with a glass bottom (Cellvis, Mountain View, USA), and cooled at room  
28 temperature. The solid and hemispheric gel was used for SLI analysis.

29 **3D Scattered Light Imaging of AgNPs.** 3D Scatter Light Imaging of NPs was performed on a  
30 laser scanning confocal microscope equipped with longpass beamsplitters (Thorlabs, USA). The  
31 light source used was a 488 nm laser (Thorlabs) with a 63 × oil immersion microscope objective  
32 lens (1.0 NA W Plan-Apochromat, Zeiss, Germany). The key parameter of 3D imaging: scanning  
33 speed, 1000 hz; the wavelength range of receiving scatter light, 483 – 493 nm; z axis step size,  
34 0.13 µm; the resolution of images, 1024 × 1024 or 2048 × 2048 pixels; frame average, 3 times.  
35 The glass bottom of the dish loading NPs immobilization gel is assumed to be the initiation point  
36 of z stack scanning in the vertical level. After the completement of z stack scanning, the images

37 series were imported into Image J software for 3D reconstruction, the maximum signal projection,  
38 number count and size measurement of NPs.

39 **The measurement of AgNPs mass concentration by ICP-MS.** The mass concentration of  
40 AgNPs in gel was measured by using inductively coupled plasma mass spectrometer (ICP-MS,  
41 Agilent 8800). AgNPs in the immobilization gel were transformed into silver ion by acidic  
42 digestion solution (8 mL 65% HNO<sub>3</sub> and 2 mL 30% H<sub>2</sub>O<sub>2</sub>). The digestion process was assisted by  
43 microwave heating (120 °C, 2 h). <sup>115</sup>In isotopes were used as internal standard. Calibrations were  
44 carried on by using ionic silver standards solution ranging from 0 to 20 ng/mL. Total amounts of  
45 silver in the gel were determined by ICP-MS in five independent replicates.

46 **The characterization of AgNPs by dynamic light scattering.** Hydrodynamic diameter of  
47 AgNPs was measured by using dynamic light scattering (DLS) (ZS90 Zetasizer, Malvern, UK).  
48 The NPs was suspended into water at about 10 µg/mL and analyzed by DLS. The size distribution  
49 of AgNPs were acquired using the Zetasizer Software v.7.02.

50 **The characterization of AgNPs by transmission electron microscopy.** The size and  
51 morphology of AgNPs were characterized using a transmission electron microscopy (TEM) (JEM-  
52 2100F, Toyota, Japan). The stock solution of each AgNPs was diluted to 10 µg/mL by ultrapure  
53 water. Then 5 µL of the diluent was pipetted onto an ultrafine carbon support film on a copper grid  
54 (200 mesh) and dried in vacuum drying oven at 55 °C. The size distribution of AgNPs in TEM  
55 images was analyzed and calculated by Image J and Origin 2018 software, respectively.

56 **Statistical Analysis.** All experimental results were analyzed by using GraphPad Prism 7.00  
57 software and presented as means ± standard deviation (SD). Statistical significance of differences  
58 between groups was assessed by using Student's t test.

59

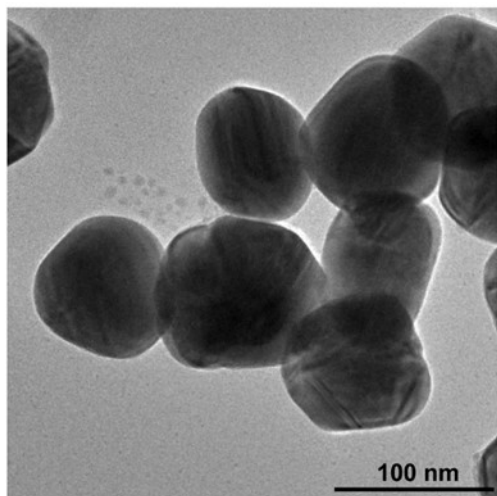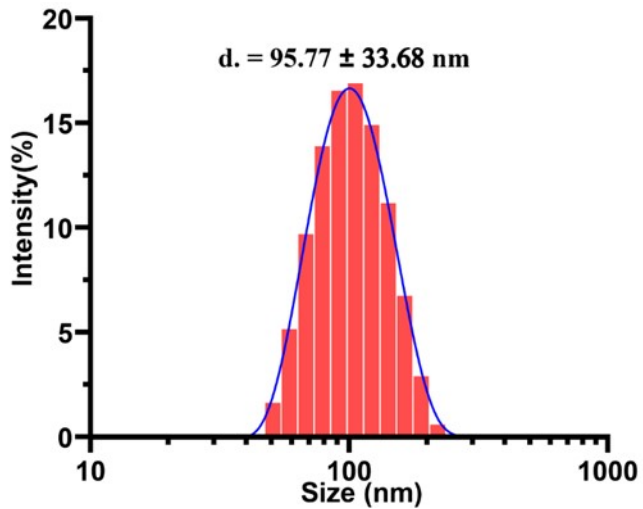

60

61 **Fig. S1** The morphology and size of 100 nm citric acid-coated AgNPs were characterized using  
62 TEM (left) and DLS (right) respectively.

63

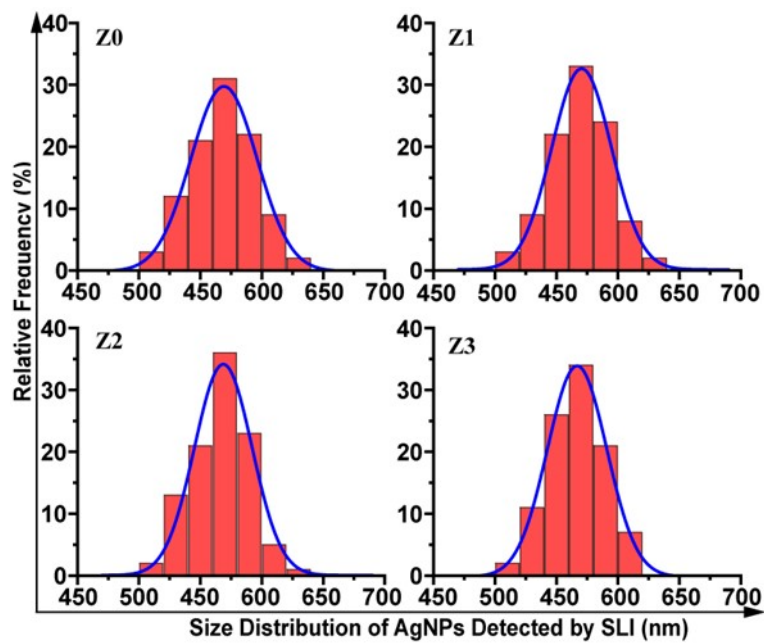

64

65 **Fig. S2** The size distribution of AgNPs located at the different height of the gel (Z0 to Z3). The  
 66 size distribution of AgNPs is determined by counting 100 single particle in SLI images at random.

67

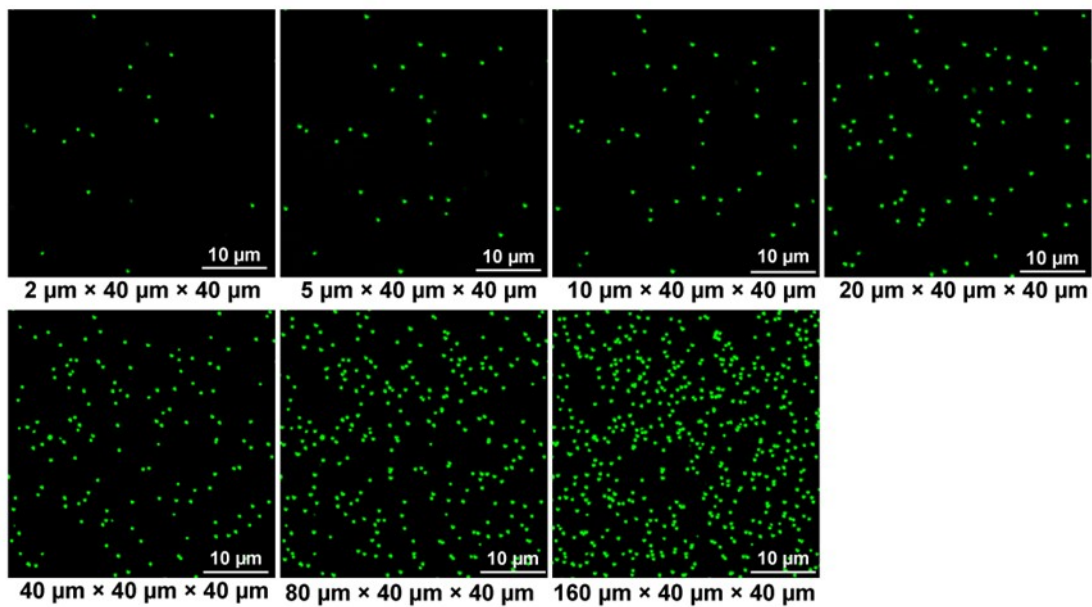

68

69 **Fig. S3** The representative SLI images for planar projection of AgNPs in different scanning  
70 volume of 3D reconstruction. The total number of AgNPs in the planar images is automatically  
71 counted by using Image J software.

72

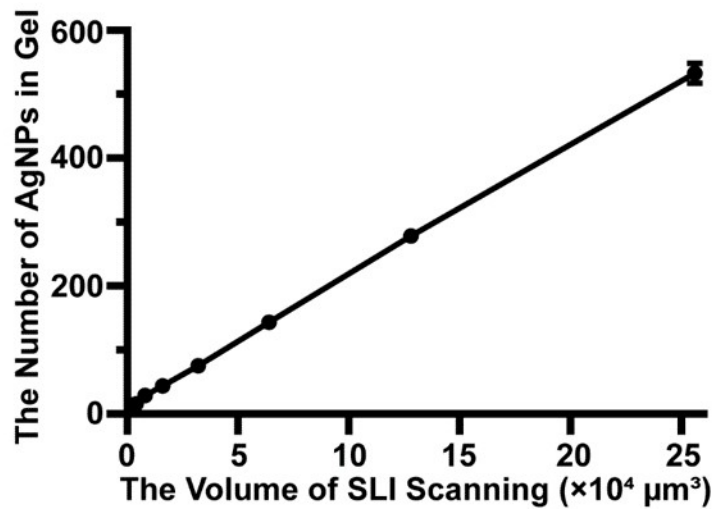

73

74 **Fig. S4** Correlation between AgNP number and scanning volume. The total number of AgNPs in  
75 the planar images is automatically counted by using Image J software.

76

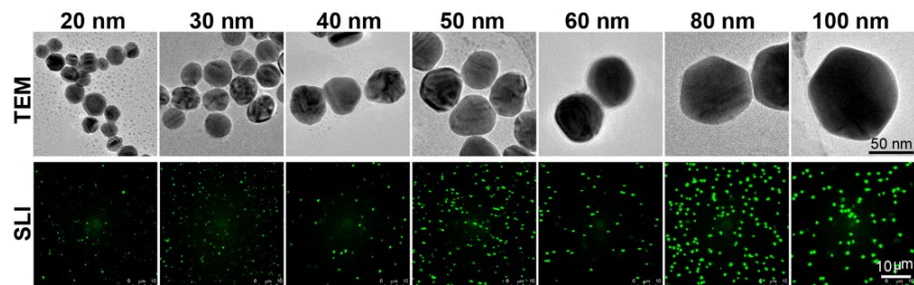

77

78 **Fig. S5** Representative TEM (top) and SLI (bottom) images of AgNPs with different size.

79

80



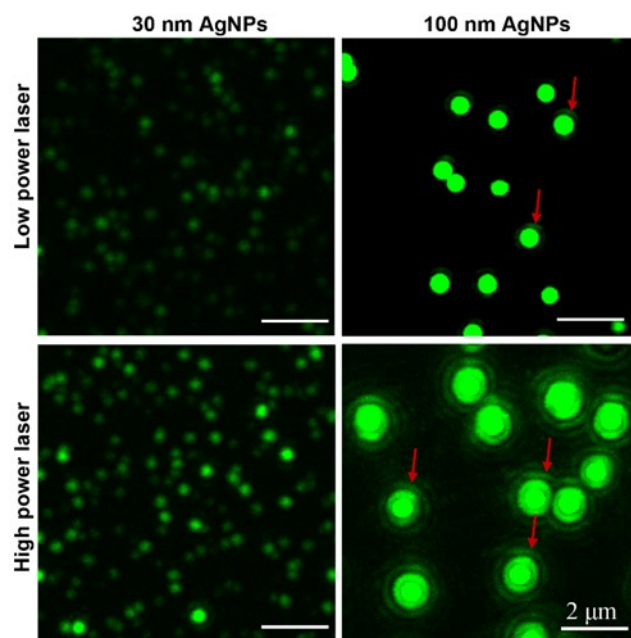

81

82 **Fig. S6** Representative SLI images of 30 and 100 nm AgNPs using low or high power laser. Red  
83 arrows indicate the ghost of scattered light around AgNPs.

84

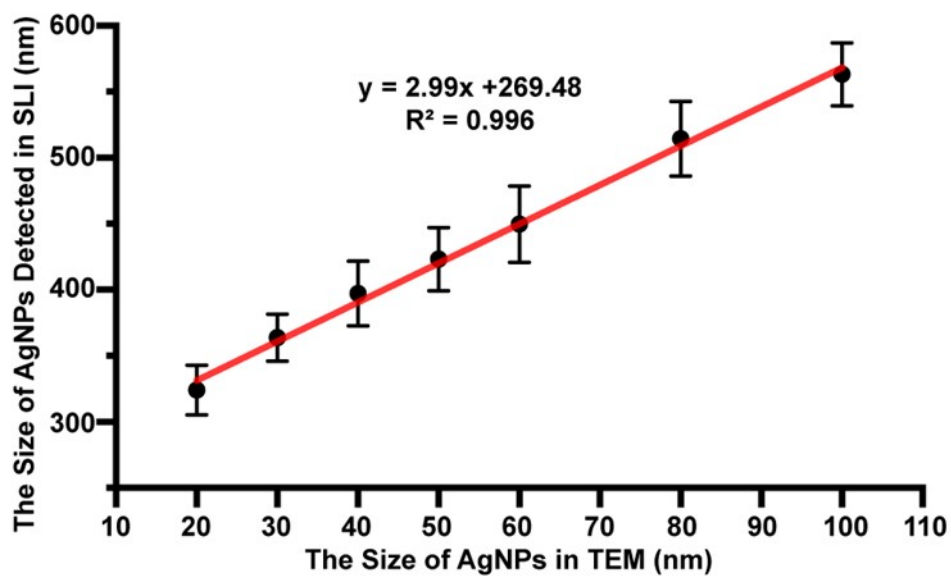

85

86 **Fig. S7** Correlation of the AgNPs sizes between in SLI and TEM images. The average diameter  
87 of each size of AgNPs is determined by counting about 500 single particles in SLI and TEM images  
88 at random.

89

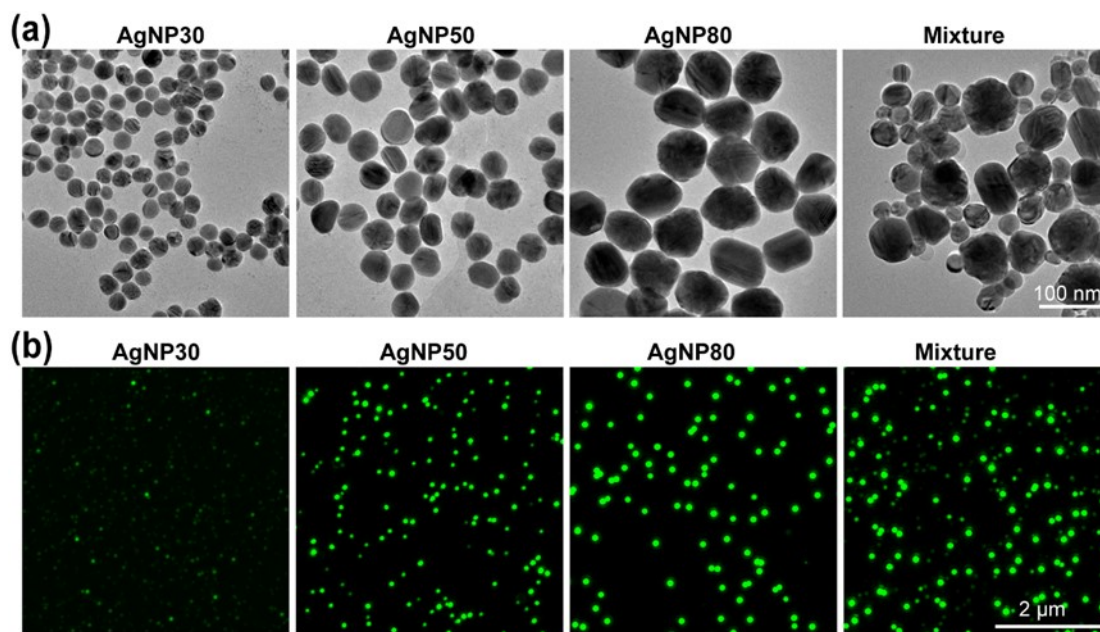

90

91 **Fig. S8** Representative TEM (a) and SLI (b) images of three AgNPs (30, 50, and 80 nm) and their  
92 mixtures.

93

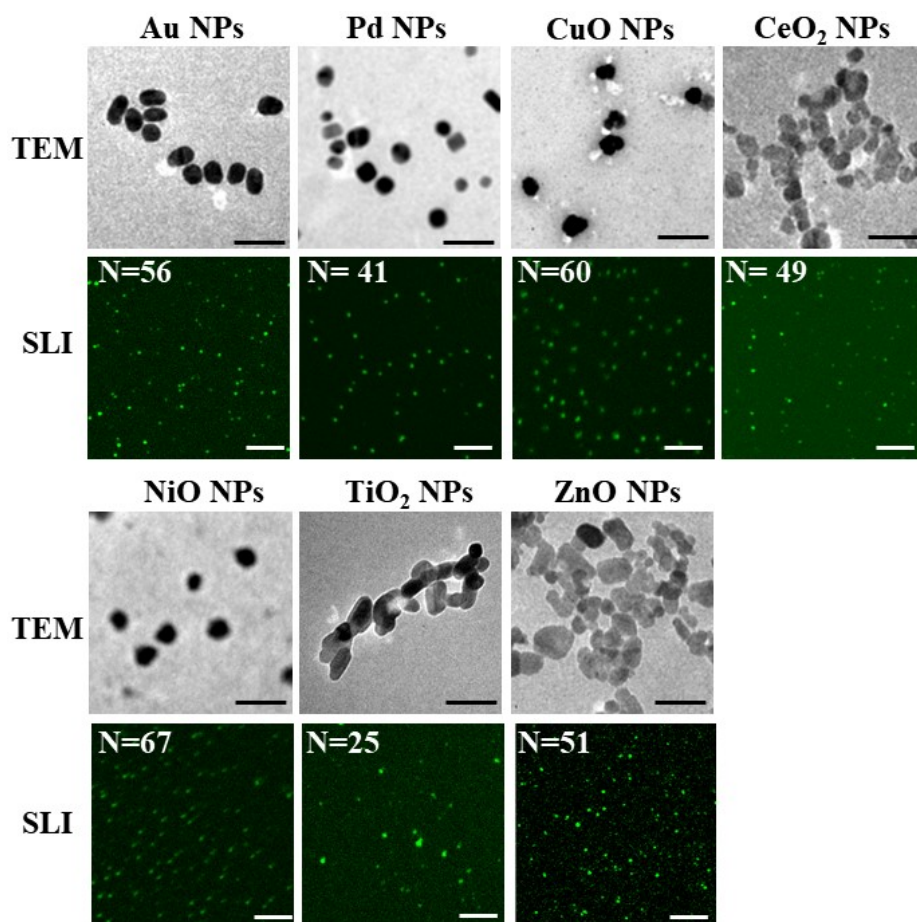

94

95 **Fig. S9** Representative TEM and SLI images of AuNPs, PdNPs, CuO NPs, CeO<sub>2</sub> NPs, NiO NPs,  
 96 TiO<sub>2</sub> NPs and ZnO NPs with size about 20 nm. The scale bar, 50 nm (TEM), 2 μm (SLI).

97
